# Supplementary material for: The Effect of Microwave Radiation on the Green Color Loss of Green Tea Powder
Source: MDPI journal article supplement (doi:10.3390/foods11162540), 2022-08-22
Supplement: s1 [file s1]

## **Supplementary Materials**

### **The effect of microwave radiation on the green color loss of green tea powder**

Huijuan Wang<sup>†</sup>, Yan Zhu<sup>†</sup>, Dongchao Xie, Haihua Zhang, Yahui Zhang, Peng Jin<sup>\*</sup>, Qizhen Du<sup>\*</sup>

*Department of Food Science and Technology, The College of Food and Health, Zhejiang A & F University, Linan, 311300, China*

<sup>†</sup> These authors contributed equally.

<sup>\*</sup> Corresponding Author: The College of Agricultural and Food Sciences, Zhejiang A & F University, Hangzhou 311300, China. Tel.: +86-571-63742176; Fax: +86-571-88218710. E-mail addresses: jinpeng@zafu.edu.cn (P. Jin), qizhendu@163.com (Q. Du).

### 1 Color spectrum

The color spectrum in CIE system in the second phase limit include yellow and green (Figure S1).

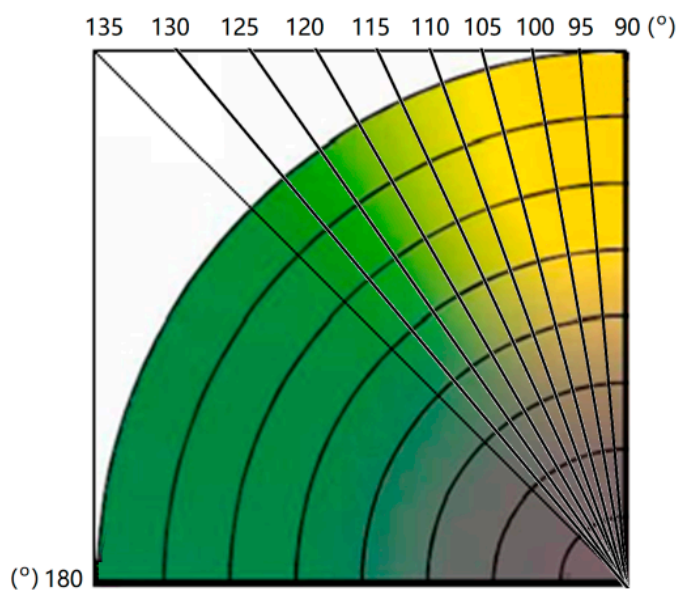

**Figure S1** The color spectrum corresponding Hue angle 90–135°

### 2 Calibration of $L$ , $a$ , and $b$ values

A spectrophotometer is usually used to measure  $L$ ,  $a$ , and  $b$  values for various samples. However, it could not provide actual values for powdery samples because light scatters among powdery particles. Therefore, the measured  $L$ ,  $a$ , and  $b$  values of green tea powder must be calibrated.

After color pictures of green tea powder treated with a series of microwave radiation were obtained, the color was matched with the SLcolor software, which could give the corresponding  $L$ ,  $a$ , and  $b$  values (Figure S2). The average values of the ratio of

matched value/measured value for L, a, and b for six green tea powder samples were  $0.951 \pm 0.080$ ,  $2.293 \pm 0.017$ , and  $1.115 \pm 0.075$  ( $n = 6$ ), respectively, indicating that the calibrated values ( $L^*$ ,  $a^*$ , and  $b^*$ ) from the measured L, a, and b values could be obtained by the calibration coefficients 0.951, 2.293, and 1.115, respectively.

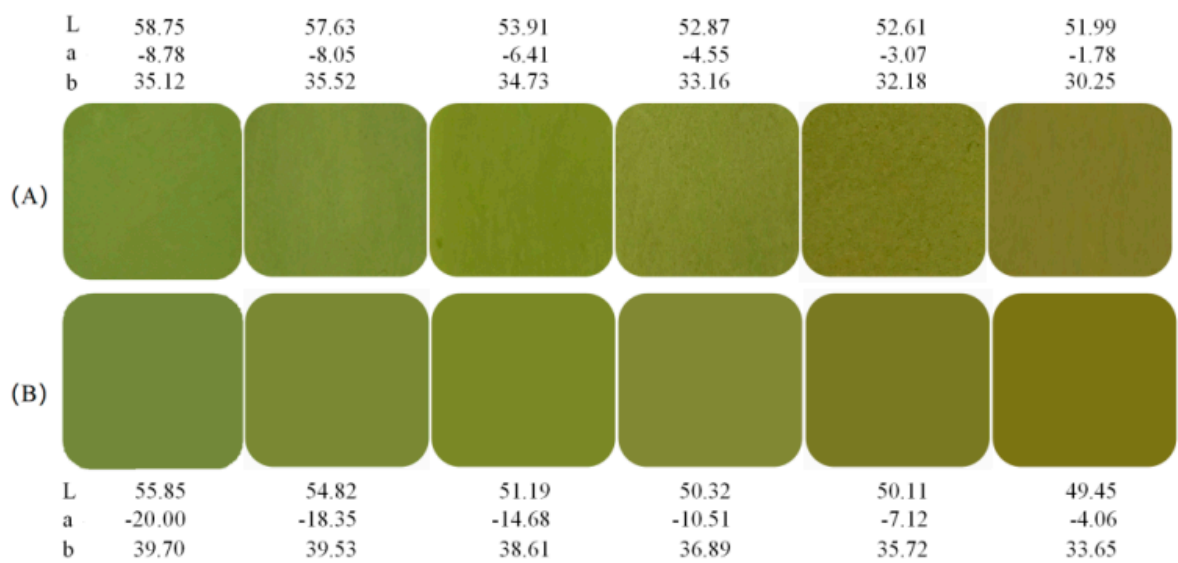

**Figure S2** The color and measured L, a, and b value (A) and the corresponding matched color and values of L, a and b given by software for the GTP samples (B).
